# Supplementary material for: Variation of Human Salivary O-Glycome
Source: PubMed Central journal article supplement (PMC5017618; doi:10.1371/journal.pone.0162824), 2016-09-09
Supplement: pone.0162824.s001.pdf [file pone.0162824.s001.pdf]

| UHPLC Peak Id | Average   |        | Structure                                                                           | HILIC-UHPLC-ESI-MS and MS/MS |            |            |                               |                                |                               |                                |                                                                                                                                                                                                                               |
|---------------|-----------|--------|-------------------------------------------------------------------------------------|------------------------------|------------|------------|-------------------------------|--------------------------------|-------------------------------|--------------------------------|-------------------------------------------------------------------------------------------------------------------------------------------------------------------------------------------------------------------------------|
|               | GU (PROC) | % Area |                                                                                     | Composition                  |            |            | [m/z] <sup>+</sup> calculated | [m/z] <sup>2+</sup> calculated | [m/z] <sup>+</sup> registered | [m/z] <sup>2+</sup> registered | [m/z] characteristic B and Y fragment ions (composition)                                                                                                                                                                      |
|               |           |        |                                                                                     | Hex (H)                      | HexNAc (N) | Neu5Ac (S) |                               |                                |                               |                                |                                                                                                                                                                                                                               |
| 1             | 1.93      | 6.80   |    | 1                            | 1          | 0          | 603.32                        | 302.17                         | 603.35                        | nd                             | 441.30 (N1-PROC)                                                                                                                                                                                                              |
| 2             | 2.18      | 16.15  |    | 1                            | 0          | 1          | 691.34                        | 346.17                         | 691.36                        | nd                             | 292.12 (S); 400.27 (H1-PROC)                                                                                                                                                                                                  |
| 3             | 2.50      | 62.82  |    | 1                            | 1          | 1          | 894.42                        | 447.71                         | 894.41                        | nd                             | 441.31 (N1-PROC); 603.34 (H1N1-PROC)                                                                                                                                                                                          |
| 4             | 3.13      | 1.59   |    | 1                            | 1          | 1          | 894.42                        | 447.71                         | 894.41                        | nd                             | 441.32 (N1-PROC); 603.37 (H1N1-PROC)                                                                                                                                                                                          |
| 5             | 3.90      | 10.42  |   | 1                            | 1          | 2          | 1185.51                       | 593.26                         | 1185.54                       | 593.30                         | 292.13 (S); 441.26 (N1-PROC); 454.16 (HS); 603.33 (H1N1-PROC); 732.36 (N1S1-PROC); 894.38 (H1N1S1-PROC)                                                                                                                       |
| 6             | 4.91      | 2.22   |  | 2                            | 2          | 2          | 1550.65                       | 775.83                         | nd                            | 775.84                         | 292.12 (S); 366.18 (H1N1); 441.28 (N1-PROC); 454.16 (H1S1); 603.36 (H1N1-PROC); 644.34 (N2-PROC); 657.24 (H1N1S1); 806.40 (H1N2-PROC); 894.39 (H1N1S1-PROC); 968.38 (H2N2-PROC); 1097.46 (H1N2S1-PROC); 1259.51 (H2N2S1-PROC) |
