# Supplementary material for: Variation of Human Salivary O-Glycome
Source: PubMed Central journal article supplement (PMC5017618; doi:10.1371/journal.pone.0162824), 2016-09-09

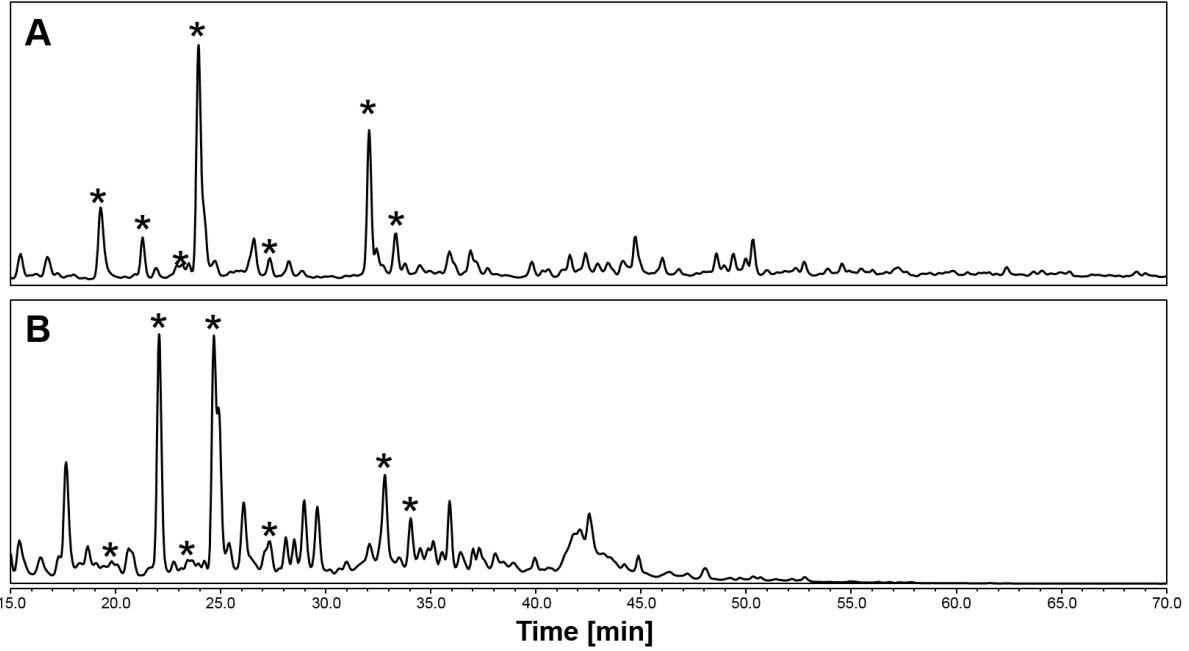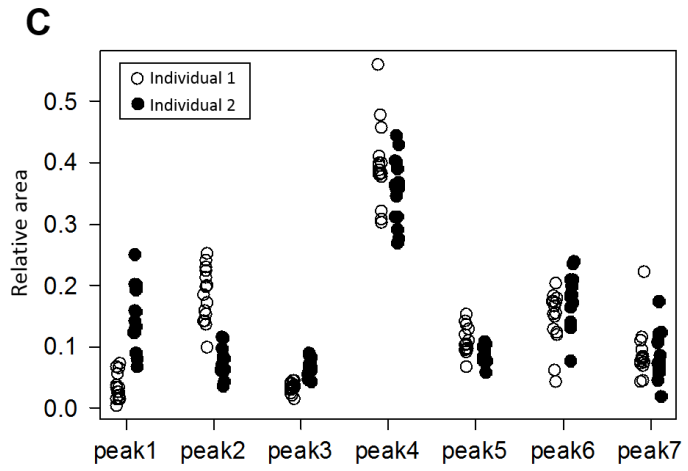

Supplement: pone.0162824.s004.pdf [file pone.0162824.s004.pdf]
